# Supplementary material for: Nucleo-copolymers: oligonucleotide-based amphiphilic diblock copolymers
Source: Royal Society of Chemistry journal article supplement (doi:10.1039/b617109e), 2007-01-01

**Synthesis.** Cytidine<sub>12</sub> (15 $\mu$ mol), coupled to the carboxy-terminated linker and still bound to the phosphoramidite resin, was put into a 2mL Eppendorf vial and swollen in 1.0mL of dichloromethane (DCM). Diisopropylcarbodiimide, DIC (10eq) was, then, placed into this vial. Amino-terminated poly(butadiene), PB-NH<sub>2</sub> (10eq) was dissolved in 0.5mL of DMC and transferred to the Eppendorf vial containing Cytidine<sub>12</sub> and DIC. The mixture was placed in a mechanical shaker for 6h at room temperature. After that, the material was washed three times with DCM and swollen in 1.5mL of a 32% Ammonia solution and placed on a shaker over night at 40°C, in order to cleave the nucleo-copolymer from the resin.

**Figure 3.** FT-IR Spectra

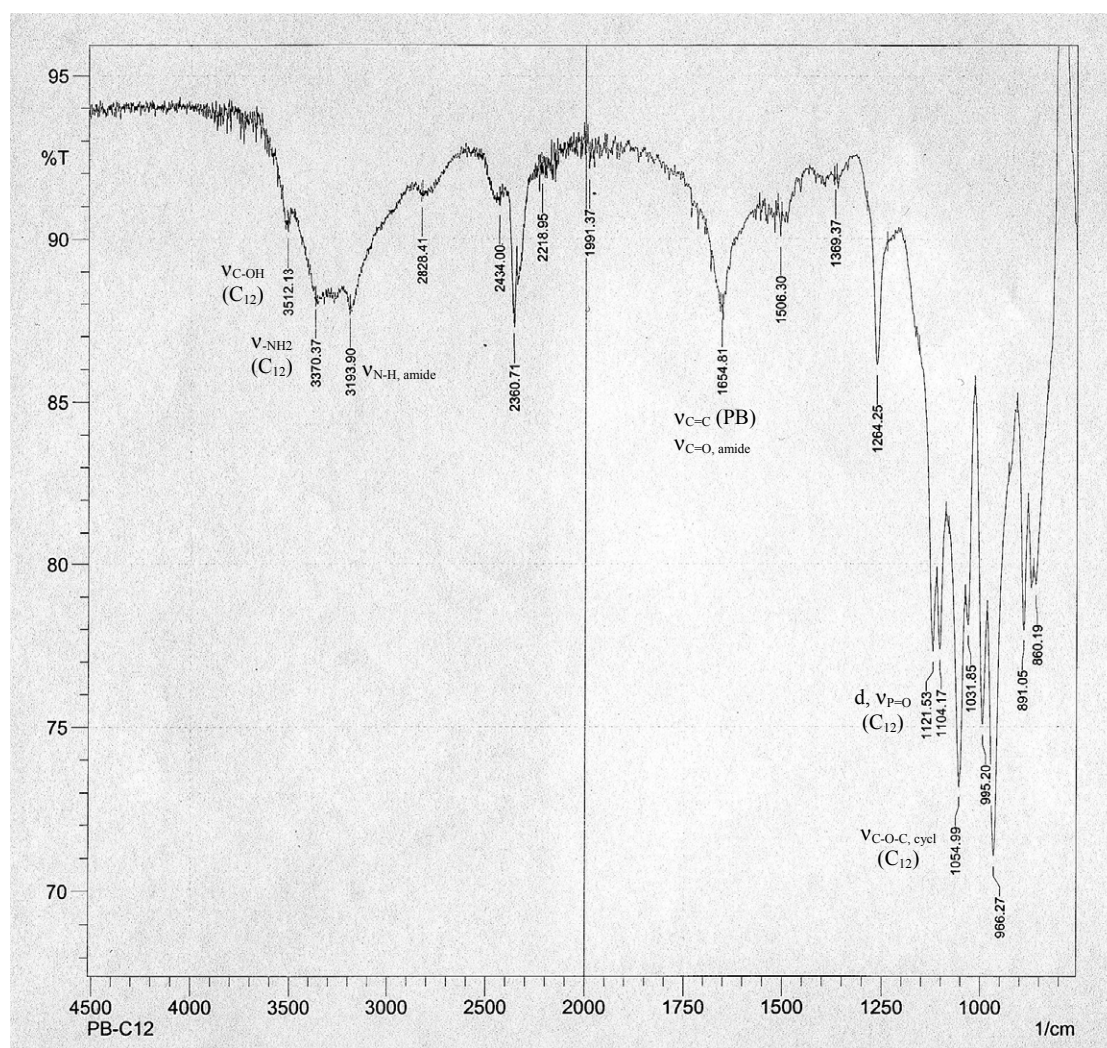

Supplement: b617109e.pdf [file b617109e.pdf]
